# Supplementary material for: Ultra-high nonlinear absorption coefficients based on multiphoton-excited self-trapped excitons in perovskite-inspired copper halides
Source: Royal Society of Chemistry journal article supplement (doi:10.1039/d4tc04210g), 2024-12-13
Supplement: d4tc04210g1.pdf [file d4tc04210g1.pdf]

## Supplementary Information

### **Ultra-high nonlinear absorption coefficients based on multiphoton-excited self-trapped excitons in perovskite-inspired copper halides**

Maolan Peng,<sup>a</sup> Xiaoming Mo,<sup>\*a</sup> Liu Tan,<sup>a</sup> Xiaoma Tao,<sup>a</sup> Yifang Ouyang,<sup>a</sup> Yulu Zhou,<sup>a</sup> Yi Liang,<sup>a</sup> and Jialong Zhao<sup>a</sup>

<sup>a</sup> Center on Nanoenergy Research, Guangxi Key Laboratory for Relativistic Astrophysics, School of Physical Science and Technology, Guangxi University, Nanning 530004, People's Republic of China.

E-mail: Prof. X. Mo, [xmmo@gxu.edu.cn](mailto:xmmo@gxu.edu.cn).

Keywords: Nonlinear optical property; Upconversion luminescence; Multiphoton absorption; Self-trapped exciton; Copper halide.

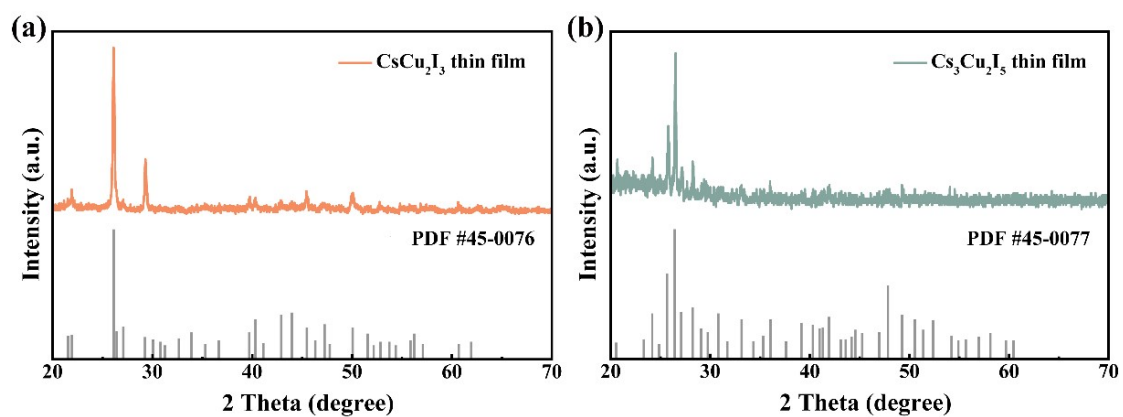

Fig. S1 (a) XRD pattern of thermal-evaporated  $\text{CsCu}_2\text{I}_3$  thin film. (b) XRD pattern of thermal-evaporated  $\text{Cs}_3\text{Cu}_2\text{I}_5$  thin film.

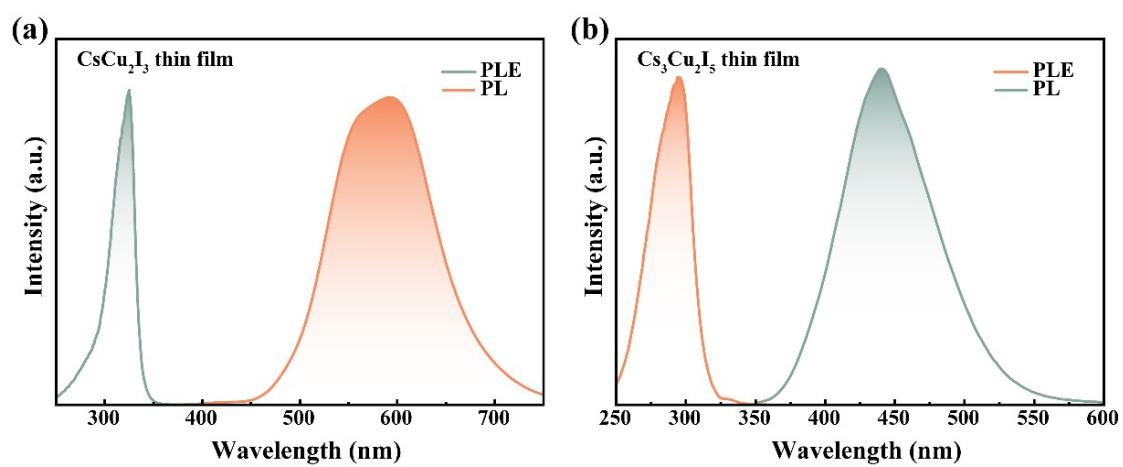

Fig. S2 (a) PL and PLE spectra for thermal-evaporated  $\text{CsCu}_2\text{I}_3$  thin film. (b) PL and PLE spectra for thermal-evaporated  $\text{Cs}_3\text{Cu}_2\text{I}_5$  thin film.

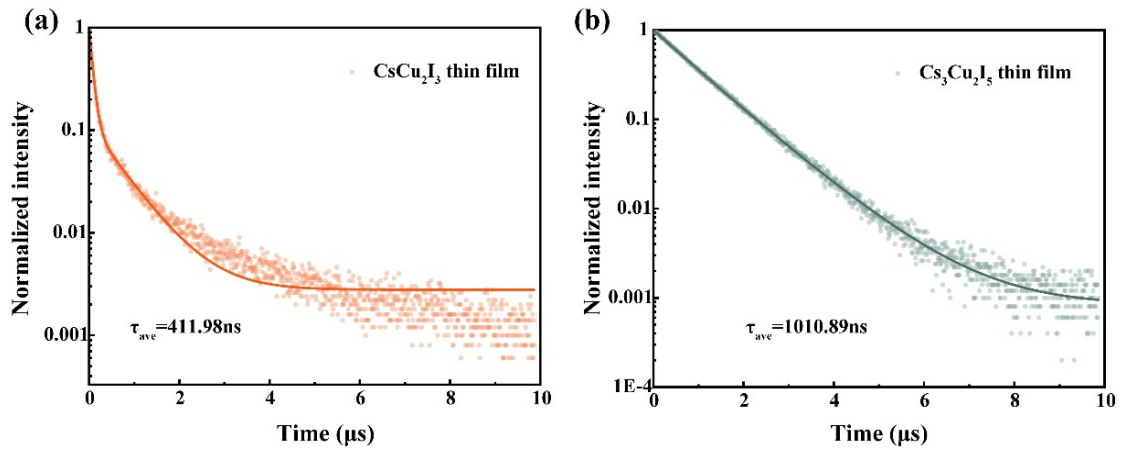

Fig. S3 (a) TRPL decay spectra for thermal-evaporated CsCu<sub>2</sub>I<sub>3</sub> thin film. (b) TRPL decay spectra for thermal-evaporated Cs<sub>3</sub>Cu<sub>2</sub>I<sub>5</sub> thin film.

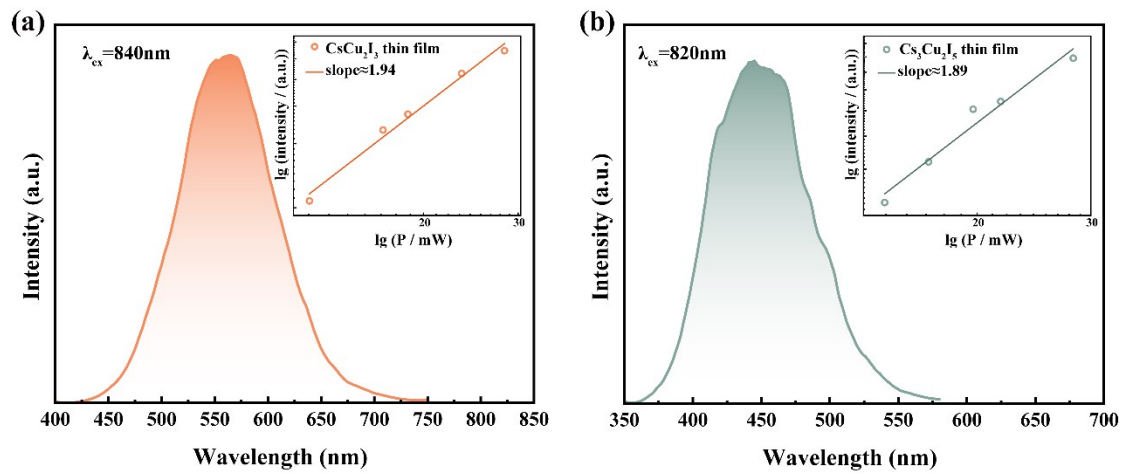

Fig. S4 (a) Upconversion PL spectra excited by 840 nm laser for the thermal-evaporated CsCu<sub>2</sub>I<sub>3</sub> thin film. Inset is dependence of the upconversion PL intensity on the laser pulse energy for the CsCu<sub>2</sub>I<sub>3</sub> thin film. (b) upconversion PL spectra excited by 820 nm laser for the thermal-evaporated Cs<sub>3</sub>Cu<sub>2</sub>I<sub>5</sub> thin film. Inset is dependence of the upconversion PL intensity on the laser pulse energy for the Cs<sub>3</sub>Cu<sub>2</sub>I<sub>5</sub> thin film.
